# Supplementary material for: The protective role of microbiota in the prevention of MPTP/P-induced Parkinson's disease by resveratrol
Source: Royal Society of Chemistry journal article supplement (doi:10.1039/d2fo03379h), 2023-01-01
Supplement: d2fo03379h1.pdf [file d2fo03379h1.pdf]

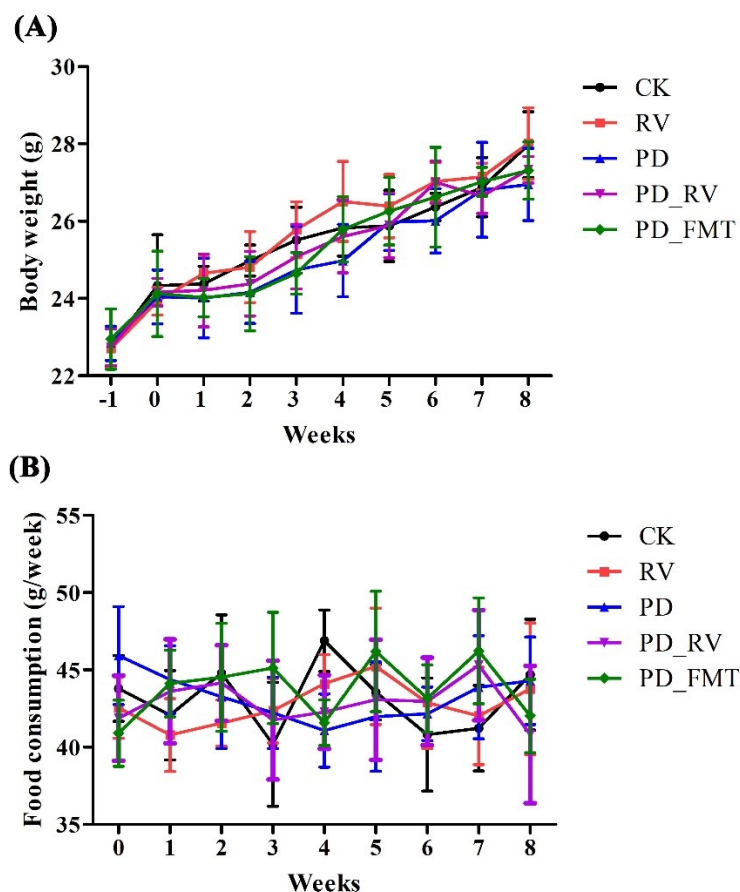

**Fig. S1** The body weight and food consumption. (A) weekly body weight. (B) weekly food consumption. The results are presented as the mean  $\pm$  standard deviation (SD);  $n = 5$  for each treatment. \*Analysis of variance (ANOVA) was used, significant differences between groups were indicated ( $P < 0.05$ ). Because FMT did not begin until the 6<sup>th</sup> week, the PD\_FMT group was a separated replica of the PD group at the 5<sup>th</sup> week.

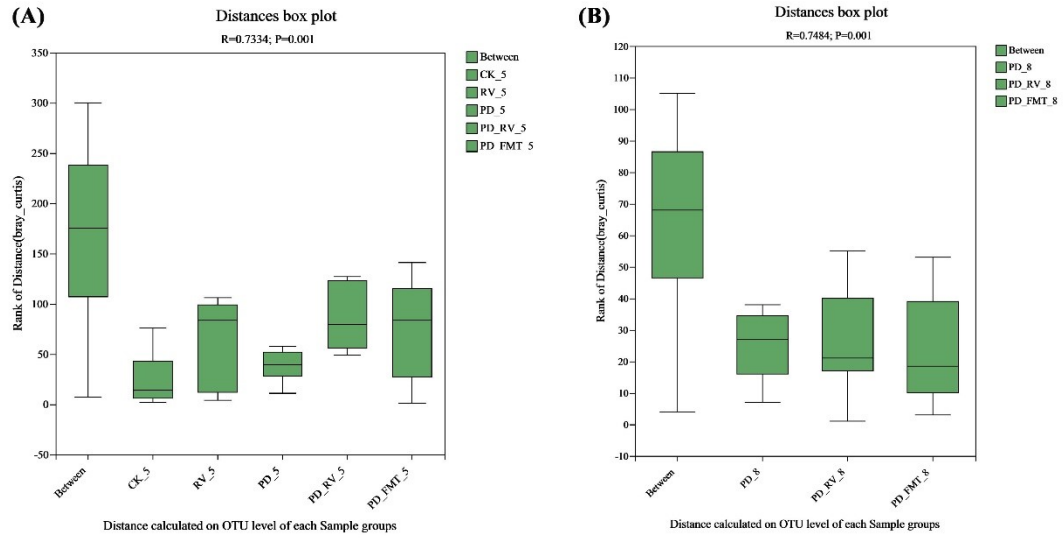

**Fig.S2** Analysis of similarities (ANOSIM) at OTU levels at the 5<sup>th</sup> and 8<sup>th</sup> week.

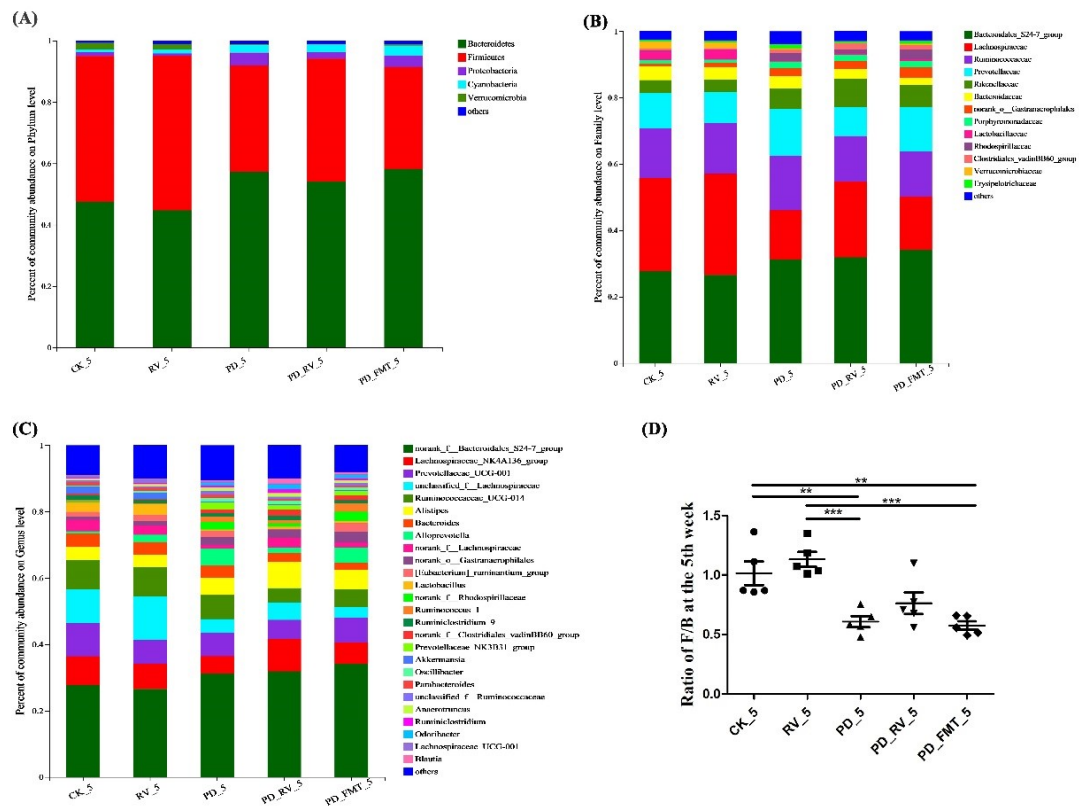

**Fig. S3** The bacterial community composition at the 5<sup>th</sup> week. Bar chart of bacteria that exceeded 1% of the total at phylum (A), family (B), and genus (C) levels. (D) The Fimicutes/Bacteroidetes (F/B) ratio. The results are presented as the mean  $\pm$  standard deviation (SD);  $n = 5$  for each treatment. \*Analysis of variance (ANOVA) was used, significant differences between groups were indicated ( $P < 0.05$ ). Because FMT did not

begin until the 6<sup>th</sup> week, the PD\_FMT group was a separated replica of the PD group at the 5<sup>th</sup> week.

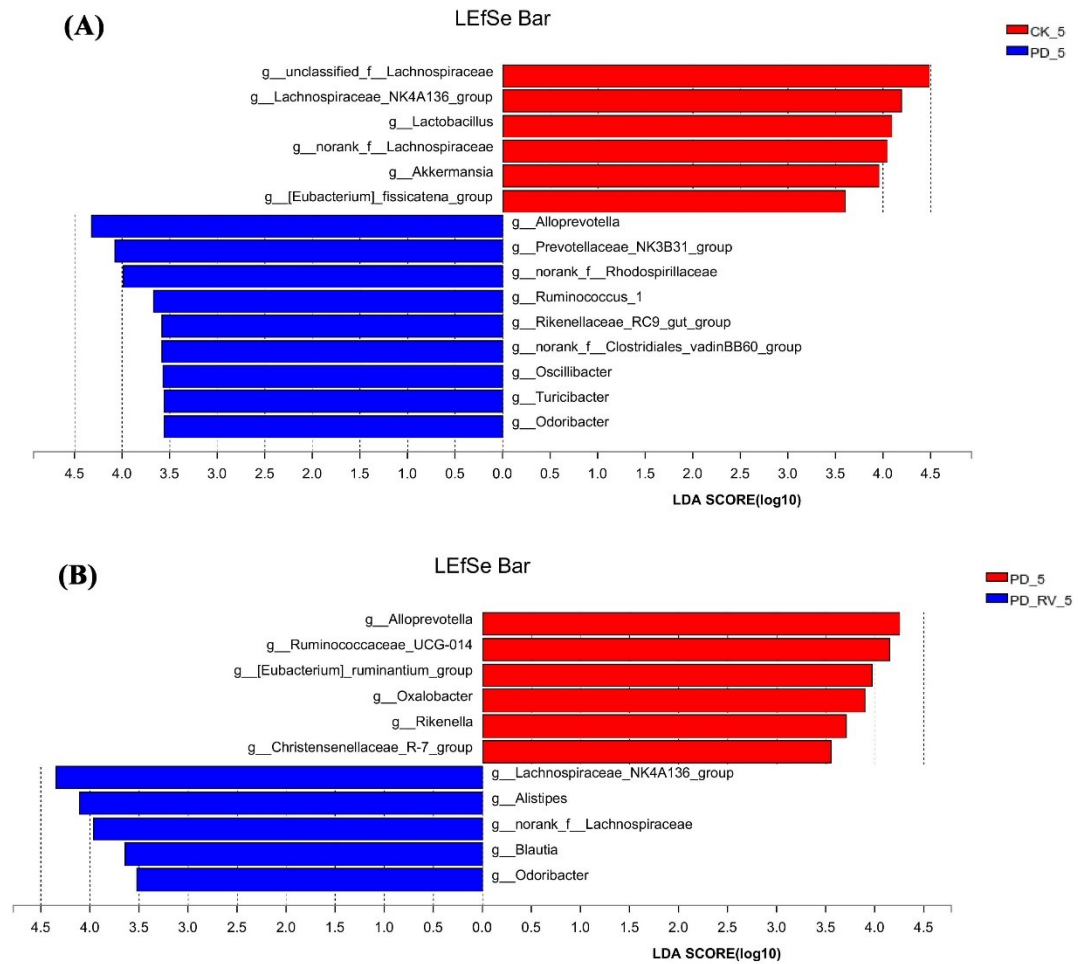

**Fig. S4** The LfSe analysis between groups at the 5<sup>th</sup> week. Non-parametric factorial Kruskal–Wallis (KW) sum-rank test was used.  $n = 5$  for each treatment.

**Table S1.** Primers used in the real-time PCR assays.

| Gene                        | Primer Sequences (5'-3')         |
|-----------------------------|----------------------------------|
| TNF- $\alpha$               |                                  |
| Forward                     | CCCTCACACTCAGATCATCTTCT          |
| Reverse                     | GCTACGACGTGGGCTACAG              |
| IL-6                        |                                  |
| Forward                     | TAGTCCTTCTACCCCAATTTCC           |
| Reverse                     | TTGGTCCTTAGCCACTCCTTC            |
| IL-1 $\beta$                |                                  |
| Forward                     | GCAACTGTTCTGAACTCAACT            |
| Reverse                     | ATCTTTTGGGGTCCGTCAACT            |
| GAPDH                       |                                  |
| Forward                     | TCTGGAAAGCTGTGGCGTGAT            |
| Reverse                     | GCCAGTGAGCTTCCCGTTCAG            |
| Total bacteria              |                                  |
| 341F                        | CCTACGGGAGGCAGCAG                |
| 518R                        | ATTACCGCGGCTGCTGG                |
| Butyrate producing bacteria |                                  |
| Bco-F                       | GCIGAICATTTACITGGAAYWSITGGCAYATG |
| Bco-R                       | CCTGCCTTTGCAATRTCIACRAANGC       |

**Table S2.** Relative abundance of Genera > 1% in different groups at 5<sup>th</sup> week.

| Relative abundances (%)            | CK         | RV         | PD         | PD_RV                   | PD_FMT      |
|------------------------------------|------------|------------|------------|-------------------------|-------------|
| norank_f_Bacteroidales_S24-7_group | 27.64±1.92 | 26.52±1.99 | 31.15±2.98 | 31.86±5.67              | 34.05±3.88* |
| Lachnospiraceae_NK4A136_group      | 8.76±1.86  | 7.63±2.74  | 5.28±1.05* | 9.81±2.87 <sup>#</sup>  | 6.45±1.58   |
| Prevotellaceae_UCG-001             | 9.94±1.79  | 7.17±1.71  | 7.11±1.88  | 5.69±0.74*              | 7.46±5.56   |
| unclassified_f_Lachnospiraceae     | 10.26±3.17 | 13.18±3.14 | 4.07±0.54* | 5.32±0.46* <sup>#</sup> | 3.30±1.32   |
| Ruminococcaceae_UCG-014            | 8.80±1.96  | 8.83±3.84  | 7.25±2.43  | 4.28±2.43*              | 5.24±1.49*  |
| <i>Alistipes</i>                   | 3.90±0.38  | 3.71±1.40  | 5.20±1.29  | 7.85±2.81*              | 5.95±2.64   |
| <i>Bacteroides</i>                 | 4.12±1.17  | 3.79±1.06  | 3.72±1.39  | 2.80±0.95               | 2.07±0.91*  |
| <i>Alloprevotella</i>              | 0.64±0.32  | 2.18±1.03  | 5.03±0.89* | 1.57±0.41* <sup>#</sup> | 4.71±2.46*  |
| norank_f_Lachnospiraceae           | 3.51±2.18  | 2.83±1.02  | 1.08±0.40* | 3.03±1.35               | 1.56±0.66*  |
| norank_o_Gastranaerophilales       | 0.88±0.67  | 1.30±0.92  | 2.41±1.57  | 2.42±1.72               | 3.22±0.64*  |
| [Eubacterium]_ruminantium_group    | 1.48±1.30  | 1.96±2.18  | 2.00±0.59  | 0.22±0.18               | 2.56±1.46   |
| <i>Lactobacillus</i>               | 2.72±2.17  | 3.04±3.11  | 0.31±0.12* | 0.58±0.41*              | 0.63±0.30*  |

|                                        |           |            |            |             |            |
|----------------------------------------|-----------|------------|------------|-------------|------------|
| norank_f_Rhodospirillaceae             | 0.28±0.16 | 0.16±0.07  | 2.25±0.79* | 1.06±0.87   | 2.78±1.69* |
| <i>Ruminococcus_1</i>                  | 0.53±0.37 | 0.26±0.21  | 1.60±0.43  | 1.01±0.57   | 2.62±1.95* |
| <i>Ruminiclostridium_9</i>             | 1.39±0.27 | 1.02±0.14  | 0.98±0.27  | 1.23±0.26   | 0.85±0.16  |
| norank_f_Clostridiales_vadinBB60_group | 0.47±0.22 | 0.25±0.07  | 1.14±0.43* | 1.80±0.68*  | 1.47±0.81* |
| Prevotellaceae_NK3B31_group            | 0.00±0.00 | 0.00±0.00  | 2.09±1.22  | 1.51±0.65   | 1.29±0.93  |
| <i>Akkermansia</i>                     | 2.14±1.28 | 1.83±1.97  | 0.30±0.24* | 0.15±0.15*  | 0.37±0.26* |
| <i>Oscillibacter</i>                   | 0.50±0.22 | 0.62±0.21  | 1.18±0.28* | 1.07±0.26   | 0.94±0.25* |
| <i>Parabacteroides</i>                 | 1.01±0.10 | 0.90±0.33  | 1.03±0.41  | 0.48±0.20   | 0.63±0.26  |
| unclassified_f_Ruminococcaceae         | 0.55±0.18 | 0.50±0.08  | 1.10±0.77  | 0.75±0.20   | 0.79±0.26  |
| <i>Anaerotruncus</i>                   | 0.39±0.19 | 0.58±0.17  | 0.91±0.38  | 0.73±0.20   | 0.64±0.11  |
| <i>Ruminiclostridium</i>               | 0.38±0.13 | 0.31±0.11  | 0.68±0.21  | 1.16±0.47*  | 0.73±0.19  |
| <i>Odoribacter</i>                     | 0.00±0.00 | 0.00±0.00  | 0.70±0.15* | 1.34±0.28*# | 1.03±0.33* |
| <i>Parasutterella</i>                  | 0.86±0.39 | 0.51±0.13  | 0.63±0.14  | 0.47±0.20   | 0.55±0.22  |
| norank_f_Ruminococcaceae               | 0.28±0.16 | 0.68±0.19  | 0.64±0.25  | 0.94±0.30   | 0.47±0.07  |
| Lachnospiraceae_UCG-001                | 0.66±0.35 | 1.28±0.87  | 0.47±0.54  | 0.45±0.28   | 0.14±0.05  |
| <i>Roseburia</i>                       | 0.50±0.53 | 0.55±0.31  | 0.61±0.41  | 0.82±0.21   | 0.40±0.26  |
| <i>Blautia</i>                         | 0.22±0.09 | 0.16±0.06  | 0.40±0.42  | 1.37±0.34*# | 0.68±0.30  |
| Rikenellaceae_RC9_gut_group            | 0.00±0.00 | 0.00±0.00  | 0.81±0.37* | 0.69±0.47*  | 0.73±0.34* |
| <i>Ruminiclostridium_6</i>             | 0.17±0.16 | 0.94±0.57* | 0.08±0.06  | 0.50±0.16*  | 0.04±0.01  |
| <i>Turicibacter</i>                    | 0.01±0.02 | 0.01±0.01  | 0.80±0.41* | 0.39±0.24*# | 0.41±0.25  |
| <i>Bilophila</i>                       | 0.15±0.11 | 0.14±0.07  | 0.43±0.26  | 0.54±0.28   | 0.25±0.07  |
| [Eubacterium]_fissicatena_group        | 0.78±0.50 | 0.43±0.45  | 0.03±0.03* | 0.00±0.00*  | 0.01±0.01* |
| <i>Butyricicoccus</i>                  | 0.08±0.04 | 0.20±0.08  | 0.21±0.09  | 0.54±0.30   | 0.17±0.16  |
| <i>Escherichia-Shigella</i>            | 0.01±0.00 | 0.00±0.00  | 0.78±0.39* | 0.00±0.00#  | 0.83±0.42* |
| <i>Ruminococcus_2</i>                  | 0.41±0.46 | 0.22±0.38  | 0.00±0.00* | 0.00±0.00*  | 0.00±0.00* |
| others                                 | 5.61±0.78 | 6.30±0.85  | 5.53±0.57  | 5.22±0.43   | 5.02±0.27  |

Note: The results are presented as mean ± SD;  $n = 5$ . \* $P < 0.05$  compared with the CK group, #  $P < 0.05$  compared with the PD group. Because FMT was not started until 6<sup>th</sup> week, the PD\_FMT group was the replica of the PD group at 5<sup>th</sup> week.

**Table S3.** Relative abundance of Genera > 1% in different groups at 8<sup>th</sup> week.

| Relative abundance(%)                   | PD         | PD_RV       | PD_FMT                 |
|-----------------------------------------|------------|-------------|------------------------|
| norank_f__Bacteroidales_S24-7_group     | 24.80±3.19 | 33.80±13.47 | 27.28±4.98             |
| Lachnospiraceae_NK4A136_group           | 10.14±4.63 | 8.97 ±1.78  | 9.52±3.33              |
| unclassified_f__Lachnospiraceae         | 8.39 ±1.34 | 9.07±5.49   | 7.80 ±3.21             |
| <i>Alistipes</i>                        | 4.20 ±1.56 | 10.87±3.83* | 7.92 ±1.71*            |
| Prevotellaceae_UCG-001                  | 4.02±0.84  | 3.36 ±1.20  | 9.43 ±5.11             |
| Ruminococcaceae_UCG-014                 | 10.28±3.27 | 2.12±0.74*  | 2.25 ±1.50*            |
| norank_f__Lachnospiraceae               | 4.12 ±1.45 | 4.49 ±1.47  | 3.05 ±1.46             |
| <i>Alloprevotella</i>                   | 2.32 ±0.48 | 2.06 ±1.30  | 3.52 ±3.04             |
| <i>Bacteroides</i>                      | 5.19 ±2.46 | 1.04 ±0.29* | 1.57 ±0.81*            |
| <i>Lactobacillus</i>                    | 4.15 ±3.42 | 0.81 ±0.54* | 0.90 ±0.63*            |
| norank_o__Gastranaerophilales           | 0.72 ±0.45 | 0.66 ±0.51  | 4.37 ±1.95*            |
| norank_f__Clostridiales_vadinBB60_group | 0.32 ±0.23 | 2.16 ±0.86* | 1.81 ±0.25*            |
| <i>Ruminiclostridium_9</i>              | 1.31 ±0.63 | 1.51 ±0.79  | 1.35 ±0.55             |
| <i>Ruminiclostridium</i>                | 0.65 ±0.31 | 1.72 ±0.37* | 1.68 ±0.77*            |
| <i>Blautia</i>                          | 0.31±0.24  | 1.07 ±0.43* | 1.91 ±1.59*            |
| <i>Akkermansia</i>                      | 2.29 ±0.88 | 0.83±0.49*  | 0.23 ±0.11*            |
| <i>Oscillibacter</i>                    | 0.82 ±0.40 | 1.24±0.39   | 1.08 ±0.51             |
| norank_f__Ruminococcaceae               | 0.63 ±0.38 | 1.36±0.52   | 0.80 ±0.36             |
| <i>Anaerotruncus</i>                    | 0.65 ±0.30 | 1.20 ±0.43  | 0.85 ±0.17             |
| <i>Odoribacter</i>                      | 0.00 ±0.00 | 1.18 ±0.37* | 1.20 ±0.10*            |
| <i>Mucispirillum</i>                    | 1.03 ±0.61 | 0.73 ±0.65  | 0.61 ±0.56             |
| Prevotellaceae_NK3B31_group             | 0.00 ±0.00 | 1.19 ±0.75* | 1.16 ±0.64*            |
| <i>Roseburia</i>                        | 0.85±0.52  | 0.47 ±0.29  | 0.82 ±0.28             |
| Lachnospiraceae_UCG-001                 | 0.93±0.26  | 0.26 ±0.05* | 0.33 ±0.13*            |
| [Eubacterium]_ruminantium_group         | 0.83 ±0.83 | 0.10 ±0.06  | 0.49±0.70              |
| norank_f__Rhodospirillaceae             | 0.07 ±0.03 | 0.15±0.04   | 0.88 ±0.63             |
| Rikenellaceae_RC9_gut_group             | 0.00 ±0.00 | 0.25±0.13*  | 0.80 ±0.16*            |
| <i>Parabacteroides</i>                  | 0.66 ±0.63 | 0.13 ±0.10  | 0.15 ±0.07             |
| <i>Enterococcus</i>                     | 0.00±0.00  | 0.21±0.42*  | 0.00±0.00 <sup>#</sup> |
| others                                  | 9.32 ±0.22 | 7.00 ±1.57  | 6.34±0.87              |

Note: The results are presented as mean ± SD;  $n = 5$ . \* $P < 0.05$  compared with the PD group, <sup>#</sup>  $P < 0.05$  compared with the PD\_RV group.
